# Supplementary material for: Pyruvate dehydrogenase complex and lactate dehydrogenase are targets for therapy of acute liver failure
Source: PubMed Central journal article supplement (PMC6057136; doi:10.1016/j.jhep.2018.03.016), 2018-08
Supplement: disclosures.pdf [file disclosures.pdf]

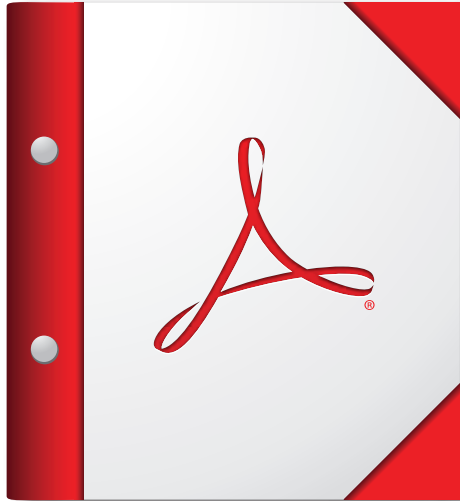

**For the best experience, open this PDF portfolio in  
Acrobat X or Adobe Reader X, or later.**

[Get Adobe Reader Now!](#)
